# Supplementary material for: Measuring the Situational Eight DIAMONDS Characteristics of Situations
Source: Atypon-hosted journal article supplement (doi:10.1027/1015-5759/a000246), 2015-02-27
Supplement: 1015-5759_a000246_esm2.pdf [file 1015-5759_a000246_esm2.pdf]

**ONLINE SUPPLEMENTAL MATERIAL B:**

**Item analyses of the RSQ-8\* with the score.items function from the “psych” R package (Revelle, 2014)**

**(Unstandardized) Alpha:**

|      |           |           |        |            |            |           |           |
|------|-----------|-----------|--------|------------|------------|-----------|-----------|
| Duty | Intellect | Adversity | Mating | pOsitivity | Negativity | Deception | Sociality |
| .80  | .83       | .77       | .71    | .81        | .90        | .80       | .88       |

**Average item correlation:**

|      |           |           |        |            |            |           |           |
|------|-----------|-----------|--------|------------|------------|-----------|-----------|
| Duty | Intellect | Adversity | Mating | pOsitivity | Negativity | Deception | Sociality |
| .45  | .50       | .40       | .33    | .46        | .64        | .44       | .60       |

**Guttman Lambda 6\* reliability:**

|      |           |           |        |            |            |           |           |
|------|-----------|-----------|--------|------------|------------|-----------|-----------|
| Duty | Intellect | Adversity | Mating | pOsitivity | Negativity | Deception | Sociality |
| .86  | .87       | .84       | .79    | .85        | .91        | .82       | .90       |

**Scale intercorrelations**

| Scale      | Duty       | Intellect  | Adversity  | Mating     | pOsitivity | Negativity | Deception  | Sociality  |
|------------|------------|------------|------------|------------|------------|------------|------------|------------|
| Duty       | <b>.80</b> | .47        | .46        | -.05       | -.23       | .48        | .29        | .05        |
| Intellect  | .38        | <b>.83</b> | .14        | .16        | .26        | .17        | .35        | .39        |
| Adversity  | .36        | .11        | <b>.77</b> | .21        | -.38       | .85        | .66        | .07        |
| Mating     | -.04       | .12        | .16        | <b>.71</b> | .36        | .13        | .44        | .63        |
| pOsitivity | -.19       | .21        | -.30       | .27        | <b>.81</b> | -.54       | -.07       | .67        |
| Negativity | .41        | .15        | .70        | .10        | -.46       | <b>.90</b> | .56        | -.03       |
| Deception  | .23        | .28        | .52        | .33        | -.05       | .48        | <b>.80</b> | .32        |
| Sociality  | .05        | .34        | .06        | .50        | .57        | -.02       | .27        | <b>.88</b> |

*Note.* Raw correlations below the diagonal; alpha on the diagonal; corrected correlations above the diagonal (corrected for attenuation).

Item by scale correlations: Corrected for item overlap and scale reliability

| Items                                                                   | Duty       | Intellect  | Adversity  | Mating     | pOsitivity | Negativity | Deception | Sociality |
|-------------------------------------------------------------------------|------------|------------|------------|------------|------------|------------|-----------|-----------|
| <i>Duty</i>                                                             |            |            |            |            |            |            |           |           |
| <b>A job needs to be done.</b>                                          | <b>.83</b> | .18        | .28        | -.14       | -.35       | .36        | .13       | -.18      |
| I am being counted on.                                                  | <b>.44</b> | .31        | .17        | .21        | .24        | .12        | .25       | .47       |
| Minor details are important.                                            | <b>.52</b> | .50        | .30        | .05        | .04        | .31        | .19       | .18       |
| <b>Task-oriented thinking is required.</b>                              | <b>.83</b> | .38        | .32        | -.17       | -.22       | .33        | .13       | -.08      |
| <b>*I have to fulfill my duties.</b>                                    | <b>.82</b> | .18        | .40        | -.08       | -.41       | .48        | .23       | -.18      |
| <i>Intellect</i>                                                        |            |            |            |            |            |            |           |           |
| <b>The Situation contains intellectual stimuli.</b>                     | .37        | <b>.86</b> | .05        | .04        | .19        | .10        | .16       | .21       |
| <b>There is the opportunity to demonstrate intellectual capacities.</b> | .41        | <b>.81</b> | .10        | .09        | .20        | .11        | .25       | .30       |
| There is the opportunity to express unusual ideas and points of views.  | .18        | <b>.69</b> | .01        | .31        | .47        | -.01       | .25       | .55       |
| The situation evokes values regarding life styles or politics.          | .16        | <b>.52</b> | .08        | .14        | .17        | .12        | .34       | .30       |
| <b>*Information needs to be deeply processed.</b>                       | .47        | <b>.72</b> | .22        | -.06       | -.13       | .28        | .22       | .01       |
| <i>Adversity</i>                                                        |            |            |            |            |            |            |           |           |
| <b>I am being criticized.</b>                                           | .24        | .09        | <b>.75</b> | .18        | -.12       | .47        | .48       | .16       |
| <b>I am being blamed for something.</b>                                 | .11        | -.02       | <b>.77</b> | .17        | -.22       | .44        | .49       | .06       |
| <b>I am being threatened by someone or something.</b>                   | .16        | .07        | <b>.65</b> | .14        | -.22       | .46        | .43       | .02       |
| I am being dominated or bossed around.                                  | .24        | -.02       | <b>.71</b> | .15        | -.20       | .49        | .41       | .08       |
| <b>*Troubles thwart me.</b>                                             | .52        | .24        | <b>.62</b> | .06        | -.37       | .76        | .37       | -.04      |
| <i>Mating</i>                                                           |            |            |            |            |            |            |           |           |
| <b>Potential sexual or romantic partners are present.</b>               | -.07       | .06        | .08        | <b>.71</b> | .22        | .08        | .18       | .38       |
| The situation contains stimuli that could be construed sexually.        | -.05       | .12        | .16        | <b>.74</b> | .19        | .11        | .33       | .26       |
| <b>Physical attractiveness is relevant.</b>                             | .09        | .13        | .18        | <b>.51</b> | .15        | .13        | .36       | .29       |
| Members of the other sex are present.                                   | -.06       | .06        | .08        | <b>.54</b> | .28        | .01        | .21       | .54       |
| <b>*The situation is sexually charged.</b>                              | -.01       | .11        | .16        | <b>.71</b> | .15        | .11        | .29       | .24       |
| <i>pOsitivity</i>                                                       |            |            |            |            |            |            |           |           |
| <b>The situation is pleasant.</b>                                       | -.27       | .20        | -.41       | .20        | <b>.82</b> | -.56       | -.16      | .43       |
| <b>The situation is playful.</b>                                        | -.08       | .14        | -.06       | .36        | <b>.59</b> | -.19       | .14       | .41       |
| The situation is humorous.                                              | -.16       | .26        | -.18       | .32        | <b>.82</b> | -.32       | .05       | .67       |
| The situation is simple and clear-cut.                                  | -.01       | .05        | -.33       | -.06       | <b>.29</b> | -.32       | -.26      | .06       |
| <b>*The situation is joyous and exuberant.</b>                          | -.21       | .19        | -.27       | .28        | <b>.89</b> | -.45       | -.06      | .60       |
| <i>Negativity</i>                                                       |            |            |            |            |            |            |           |           |
| The situation elicits feelings of anxiety.                              | .34        | .22        | .68        | .10        | -.42       | <b>.79</b> | .44       | .02       |
| <b>The situation could elicit stress.</b>                               | .52        | .17        | .63        | .10        | -.37       | <b>.81</b> | .47       | .01       |
| <b>The situation could elicit feelings of tension.</b>                  | .36        | .18        | .58        | .14        | -.33       | <b>.80</b> | .47       | .03       |

|                                                                   |      |     |      |     |      |            |            |            |
|-------------------------------------------------------------------|------|-----|------|-----|------|------------|------------|------------|
| <b>The situation could entail frustration.</b>                    | .35  | .09 | .66  | .06 | -.49 | <b>.83</b> | .40        | -.11       |
| * The situation is unpleasant.                                    | .26  | .00 | .70  | .09 | -.53 | <b>.79</b> | .43        | -.07       |
| <i>Deception</i>                                                  |      |     |      |     |      |            |            |            |
| <b>It is possible to deceive someone.</b>                         | .22  | .32 | .37  | .29 | .01  | .32        | <b>.78</b> | .25        |
| A person or activity could be undermined.                         | .21  | .20 | .46  | .25 | -.09 | .44        | <b>.59</b> | .19        |
| The situation could elicit feelings of hostility.                 | .19  | .15 | .61  | .20 | -.23 | .57        | <b>.59</b> | .07        |
| <b>Someone in this situation could be deceptive.</b>              | .16  | .14 | .44  | .28 | -.09 | .36        | <b>.71</b> | .14        |
| <b>*Not dealing with others in an honest way is possible.</b>     | .14  | .30 | .25  | .36 | .14  | .20        | <b>.70</b> | .37        |
| <i>Sociality</i>                                                  |      |     |      |     |      |            |            |            |
| Social interaction is possible.                                   | .05  | .33 | .04  | .53 | .52  | .00        | .31        | <b>.84</b> |
| <b>Close personal relationships are important or can develop.</b> | .01  | .29 | .06  | .54 | .52  | -.03       | .23        | <b>.79</b> |
| <b>Others show many communicative signals.</b>                    | .08  | .34 | .08  | .41 | .54  | -.03       | .34        | <b>.79</b> |
| A reassuring other person is present.                             | -.10 | .21 | -.07 | .47 | .52  | -.13       | .04        | <b>.65</b> |
| <b>*Communication with other people is important or desired.</b>  | .17  | .33 | .17  | .38 | .46  | .09        | .33        | <b>.86</b> |

Note. Bold items selected for the S8\*.

\* = additionally generated item for this study.
