# Supplementary material for: Measuring the Situational Eight DIAMONDS Characteristics of Situations
Source: Atypon-hosted journal article supplement (doi:10.1027/1015-5759/a000246), 2015-02-27
Supplement: 1015-5759_a000246_esm3.pdf [file 1015-5759_a000246_esm3.pdf]

ONLINE SUPPLEMENTAL MATERIAL C:

Item analyses of the S8\* with the score.items function from the “psych” R package (Revelle, 2014)

(Unstandardized) Alpha:

|      |           |           |        |            |            |           |           |
|------|-----------|-----------|--------|------------|------------|-----------|-----------|
| Duty | Intellect | Adversity | Mating | pOsitivity | Negativity | Deception | Sociality |
| .89  | .86       | .78       | .62    | .80        | .86        | .80       | .85       |

Average item correlation:

|      |           |           |        |            |            |           |           |
|------|-----------|-----------|--------|------------|------------|-----------|-----------|
| Duty | Intellect | Adversity | Mating | pOsitivity | Negativity | Deception | Sociality |
| .74  | .68       | .54       | .35    | .57        | .67        | .57       | .66       |

Guttman Lambda 6\* reliability:

|      |           |           |        |            |            |           |           |
|------|-----------|-----------|--------|------------|------------|-----------|-----------|
| Duty | Intellect | Adversity | Mating | pOsitivity | Negativity | Deception | Sociality |
| .88  | .85       | .79       | .60    | .80        | .84        | .78       | .84       |

Scale intercorrelations

| Scale      | Duty       | Intellect  | Adversity  | Mating     | pOsitivity | Negativity | Deception  | Sociality  |
|------------|------------|------------|------------|------------|------------|------------|------------|------------|
| Duty       | <b>.90</b> | .40        | .20        | -.11       | -.42       | .49        | .13        | -.13       |
| Intellect  | .35        | <b>.86</b> | .05        | .05        | .09        | .21        | .25        | .22        |
| Adversity  | .16        | .04        | <b>.78</b> | .23        | -.21       | .56        | .47        | .18        |
| Mating     | -.08       | .03        | .16        | <b>.62</b> | .36        | .16        | .42        | .50        |
| pOsitivity | -.35       | .07        | -.16       | .25        | <b>.80</b> | -.49       | .07        | .61        |
| Negativity | .43        | .18        | .46        | .12        | -.40       | <b>.86</b> | .38        | .01        |
| Deception  | .11        | .21        | .37        | .30        | .06        | .31        | <b>.80</b> | .39        |
| Sociality  | -.11       | .19        | .15        | .36        | .51        | .01        | .32        | <b>.85</b> |

Note. Raw correlations below the diagonal; alpha on the diagonal; corrected correlations above the diagonal (corrected for attenuation).

**Item by scale correlations: Corrected for item overlap and scale reliability**

| S8* Items                                                        | Duty       | Intellect  | Adversity  | Mating     | pOsitivity | Negativity | Deception  | Sociality  |
|------------------------------------------------------------------|------------|------------|------------|------------|------------|------------|------------|------------|
| <i>Duty</i>                                                      |            |            |            |            |            |            |            |            |
| A job needs to be done.                                          | <b>.89</b> | .28        | .12        | -.10       | -.38       | .40        | .09        | -.15       |
| Task-oriented thinking is required.                              | <b>.81</b> | .49        | .15        | -.16       | -.25       | .38        | .08        | -.05       |
| *I have to fulfill my duties.                                    | <b>.86</b> | .28        | .23        | -.03       | -.44       | .51        | .18        | -.14       |
| <i>Intellect</i>                                                 |            |            |            |            |            |            |            |            |
| The Situation contains intellectual stimuli.                     | .28        | <b>.88</b> | -.01       | .06        | .17        | .12        | .16        | .22        |
| There is the opportunity to demonstrate intellectual capacities. | .31        | <b>.81</b> | .03        | .09        | .17        | .13        | .27        | .30        |
| *Information needs to be deeply processed.                       | .41        | <b>.75</b> | .11        | -.03       | -.13       | .27        | .19        | .03        |
| <i>Adversity</i>                                                 |            |            |            |            |            |            |            |            |
| I am being criticized.                                           | .19        | .08        | <b>.76</b> | .17        | -.11       | .45        | .37        | .21        |
| I am being blamed for something.                                 | .10        | -.03       | <b>.86</b> | .20        | -.19       | .40        | .38        | .11        |
| I am being threatened by someone or something.                   | .15        | .07        | <b>.61</b> | .16        | -.20       | .41        | .30        | .04        |
| <i>Mating</i>                                                    |            |            |            |            |            |            |            |            |
| Potential sexual or romantic partners are present.               | -.12       | -.01       | .08        | <b>.57</b> | .25        | .07        | .19        | .32        |
| Physical attractiveness is relevant.                             | .00        | .04        | .20        | <b>.56</b> | .19        | .14        | .34        | .31        |
| *The situation is sexually charged.                              | -.07       | .07        | .17        | <b>.73</b> | .21        | .09        | .30        | .26        |
| <i>pOsitivity</i>                                                |            |            |            |            |            |            |            |            |
| The situation is pleasant.                                       | -.40       | .10        | -.29       | .19        | <b>.81</b> | -.52       | -.06       | .40        |
| The situation is playful.                                        | -.20       | .03        | -.02       | .38        | <b>.59</b> | -.16       | .18        | .41        |
| *The situation is joyous and exuberant.                          | -.35       | .07        | -.16       | .25        | <b>.86</b> | -.43       | .04        | .58        |
| <i>Negativity</i>                                                |            |            |            |            |            |            |            |            |
| The situation could elicit stress.                               | .51        | .21        | .45        | .12        | -.38       | <b>.84</b> | .35        | .06        |
| The situation could elicit feelings of tension.                  | .32        | .17        | .42        | .18        | -.33       | <b>.81</b> | .34        | .05        |
| The situation could entail frustration.                          | .37        | .14        | .49        | .10        | -.49       | <b>.77</b> | .25        | -.08       |
| <i>Deception</i>                                                 |            |            |            |            |            |            |            |            |
| It is possible to deceive someone.                               | .14        | .25        | .38        | .31        | .04        | .32        | <b>.81</b> | .30        |
| Someone in this situation could be deceptive.                    | .13        | .11        | .44        | .30        | -.06       | .36        | <b>.68</b> | .18        |
| *Not dealing with others in an honest way is possible.           | .04        | .21        | .26        | .36        | .16        | .21        | <b>.76</b> | .39        |
| <i>Sociality</i>                                                 |            |            |            |            |            |            |            |            |
| Close personal relationships are important or can develop.       | -.19       | .14        | .10        | .58        | .54        | -.04       | .25        | <b>.78</b> |
| Others show many communicative signals.                          | -.09       | .22        | .14        | .32        | .52        | -.01       | .39        | <b>.79</b> |
| *Communication with other people is important or desired.        | -.04       | .19        | .20        | .32        | .44        | .08        | .33        | <b>.85</b> |

Note. \* = additionally generated item for this study.
