# Supplementary material for: Measuring the Situational Eight DIAMONDS Characteristics of Situations
Source: Atypon-hosted journal article supplement (doi:10.1027/1015-5759/a000246), 2015-02-27
Supplement: 1015-5759_a000246_esm4.pdf [file 1015-5759_a000246_esm4.pdf]

## ONLINE SUPPLEMENTAL MATERIAL D:

### Nomological correlations of the RSQ-8\* and S8\* DIAMONDS dimensions with LIWC-categories

| Criteria             | Duty        |             | Intellect   |             | Adversity   |            | Mating      |             | pOsitivity  |             | Negativity  |             | Deception   |             | Sociality   |             |
|----------------------|-------------|-------------|-------------|-------------|-------------|------------|-------------|-------------|-------------|-------------|-------------|-------------|-------------|-------------|-------------|-------------|
|                      | RSQ-8*      | S8*         | RSQ-8*      | S8*         | RSQ-8*      | S8*        | RSQ-8*      | S8*         | RSQ-8*      | S8*         | RSQ-8*      | S8*         | RSQ-8*      | S8*         | RSQ-8*      | S8*         |
| I                    | -.06        | -.01        | -.07        | -.05        | .00         | -.01       | -.08        | -.04        | <b>-.11</b> | -.08        | .04         | .02         | -.02        | -.06        | <b>-.16</b> | <b>-.17</b> |
| We                   | -.08        | <b>-.14</b> | <b>.13</b>  | .05         | -.04        | -.01       | .08         | <b>.09</b>  | <b>.21</b>  | <b>.22</b>  | -.07        | -.07        | .04         | .03         | <b>.28</b>  | <b>.27</b>  |
| Self                 | <b>-.09</b> | -.05        | -.03        | -.03        | -.01        | -.02       | -.05        | -.01        | -.04        | -.02        | .02         | .00         | -.01        | -.05        | -.07        | -.08        |
| You                  | .00         | -.02        | .03         | .00         | .06         | .08        | -.03        | -.08        | .06         | .05         | .02         | .00         | .07         | .06         | <b>.14</b>  | <b>.13</b>  |
| Negate               | .00         | .05         | -.06        | -.02        | .00         | -.01       | <b>-.11</b> | -.05        | <b>-.14</b> | <b>-.12</b> | -.01        | -.03        | -.05        | -.04        | <b>-.18</b> | <b>-.17</b> |
| Assent               | -.07        | -.05        | -.03        | -.04        | -.03        | -.02       | .00         | -.01        | .03         | .03         | -.04        | -.05        | -.03        | -.04        | -.02        | -.02        |
| Affect               | <b>-.09</b> | <b>-.14</b> | .00         | -.02        | <b>.09</b>  | <b>.11</b> | <b>.27</b>  | <b>.27</b>  | <b>.17</b>  | <b>.21</b>  | .02         | .01         | <b>.09</b>  | <b>.10</b>  | <b>.19</b>  | <b>.15</b>  |
| Positive emotions    | <b>-.11</b> | <b>-.17</b> | .04         | .01         | -.02        | .01        | <b>.32</b>  | <b>.31</b>  | <b>.29</b>  | <b>.31</b>  | -.08        | -.07        | .07         | <b>.11</b>  | <b>.30</b>  | <b>.24</b>  |
| Positive feelings    | .02         | .02         | -.01        | -.01        | .04         | .00        | .08         | .08         | .00         | .01         | .00         | .00         | .05         | .06         | .01         | .01         |
| Optimism             | .02         | .01         | .04         | .03         | .03         | .03        | .04         | .06         | .01         | .02         | .03         | .02         | -.03        | -.03        | <b>.10</b>  | .07         |
| Negative emotions    | .05         | .07         | <b>-.10</b> | -.06        | <b>.25</b>  | <b>.23</b> | <b>-.09</b> | -.06        | <b>-.25</b> | <b>-.22</b> | <b>.22</b>  | <b>.19</b>  | .06         | .01         | <b>-.22</b> | <b>-.19</b> |
| Anxiety              | .05         | .06         | .01         | .03         | <b>.22</b>  | <b>.21</b> | .00         | .02         | <b>-.11</b> | <b>-.09</b> | <b>.14</b>  | <b>.10</b>  | .07         | .05         | -.01        | -.01        |
| Anger                | .04         | .04         | .06         | .07         | <b>.30</b>  | <b>.30</b> | -.01        | -.05        | <b>-.13</b> | <b>-.12</b> | <b>.19</b>  | <b>.15</b>  | <b>.11</b>  | .07         | -.02        | .00         |
| Sadness              | .03         | .05         | <b>-.10</b> | -.07        | .04         | .04        | <b>-.12</b> | -.06        | <b>-.16</b> | <b>-.14</b> | .08         | .07         | -.01        | -.05        | <b>-.24</b> | <b>-.20</b> |
| Cognitive mechanisms | .06         | <b>.09</b>  | -.01        | .00         | <b>.09</b>  | .04        | -.07        | -.05        | <b>-.12</b> | <b>-.12</b> | <b>.18</b>  | <b>.15</b>  | .06         | .03         | -.03        | -.02        |
| Cause                | .03         | .00         | .02         | .01         | .04         | .02        | -.01        | .01         | -.06        | -.07        | <b>.09</b>  | .07         | .02         | .02         | .03         | .00         |
| Insight              | .05         | <b>.10</b>  | -.02        | .00         | .05         | .02        | -.05        | -.05        | <b>-.09</b> | <b>-.09</b> | .08         | .07         | -.02        | -.03        | -.06        | -.05        |
| Discrepancy          | .00         | -.05        | .05         | .02         | -.05        | -.04       | -.01        | -.03        | .05         | .06         | .02         | .01         | <b>.10</b>  | <b>.09</b>  | <b>.12</b>  | <b>.12</b>  |
| Inhibition           | .04         | .01         | -.03        | -.01        | .05         | .03        | -.04        | .01         | -.08        | -.08        | <b>.11</b>  | <b>.11</b>  | .05         | .01         | -.03        | -.01        |
| Tentative            | -.01        | .00         | -.02        | -.02        | .06         | .06        | -.03        | -.03        | -.02        | .01         | .06         | .04         | <b>.12</b>  | <b>.12</b>  | .04         | .05         |
| Certainty            | .08         | <b>.09</b>  | .08         | .08         | .08         | .01        | -.01        | -.03        | -.06        | -.05        | <b>.15</b>  | <b>.13</b>  | .00         | -.01        | .01         | -.02        |
| Senses               | <b>-.14</b> | <b>-.16</b> | .01         | -.03        | -.07        | .01        | <b>.12</b>  | <b>.10</b>  | <b>.18</b>  | <b>.15</b>  | <b>-.13</b> | <b>-.13</b> | -.02        | .02         | <b>.20</b>  | <b>.20</b>  |
| See                  | -.02        | -.04        | .06         | .05         | -.04        | -.02       | -.01        | -.03        | .05         | .05         | .03         | .04         | .07         | <b>.09</b>  | .00         | .00         |
| Hear                 | .02         | .04         | .05         | .05         | -.02        | -.02       | .06         | .06         | -.02        | -.02        | .03         | .05         | <b>.09</b>  | .05         | .01         | .00         |
| Social               | -.05        | <b>-.16</b> | <b>.17</b>  | <b>.09</b>  | -.02        | .02        | <b>.21</b>  | <b>.16</b>  | <b>.33</b>  | <b>.31</b>  | -.07        | -.07        | <b>.11</b>  | <b>.12</b>  | <b>.52</b>  | <b>.51</b>  |
| Communication        | .07         | .03         | <b>.18</b>  | <b>.16</b>  | .04         | .04        | .02         | .01         | .07         | .04         | .06         | .04         | <b>.10</b>  | <b>.09</b>  | <b>.22</b>  | <b>.24</b>  |
| Other reference      | -.06        | <b>-.11</b> | <b>.12</b>  | .06         | .01         | .02        | .08         | .05         | <b>.15</b>  | <b>.16</b>  | .03         | .02         | .05         | .03         | <b>.29</b>  | <b>.27</b>  |
| Friends              | -.08        | <b>-.15</b> | .05         | .00         | -.06        | -.01       | <b>.30</b>  | <b>.30</b>  | <b>.27</b>  | <b>.26</b>  | -.07        | -.08        | .07         | <b>.10</b>  | <b>.37</b>  | <b>.32</b>  |
| Family               | <b>-.09</b> | <b>-.15</b> | .05         | -.01        | -.03        | .00        | <b>.11</b>  | .06         | <b>.18</b>  | <b>.17</b>  | -.07        | -.08        | .02         | .02         | <b>.26</b>  | <b>.25</b>  |
| Humans               | .02         | .00         | -.06        | <b>-.09</b> | -.03        | -.02       | <b>.10</b>  | .07         | .04         | .05         | -.03        | -.01        | .07         | .07         | <b>.12</b>  | <b>.11</b>  |
| Inclusion            | .03         | .02         | .06         | .02         | .01         | .02        | .01         | -.02        | .05         | .03         | .02         | .01         | .04         | .03         | <b>.18</b>  | <b>.20</b>  |
| Exclusion            | -.03        | -.05        | -.06        | <b>-.10</b> | .08         | .06        | .08         | .04         | .00         | .00         | .07         | .08         | .06         | .06         | .07         | .05         |
| Motion               | -.08        | -.07        | <b>-.15</b> | <b>-.16</b> | -.08        | -.04       | .02         | .00         | .05         | .04         | <b>-.10</b> | <b>-.10</b> | -.08        | -.05        | .00         | .00         |
| Occupation           | <b>.32</b>  | <b>.34</b>  | <b>.15</b>  | <b>.23</b>  | <b>.09</b>  | .00        | <b>-.13</b> | <b>-.15</b> | <b>-.15</b> | <b>-.19</b> | .08         | .08         | .02         | .04         | -.04        | -.03        |
| School               | <b>.20</b>  | <b>.22</b>  | <b>.17</b>  | <b>.22</b>  | .05         | -.02       | -.03        | -.08        | -.04        | -.06        | .01         | .01         | .00         | .02         | .03         | .02         |
| Job                  | <b>.26</b>  | <b>.27</b>  | .07         | <b>.13</b>  | .05         | .00        | <b>-.13</b> | <b>-.12</b> | <b>-.17</b> | <b>-.19</b> | .08         | .08         | .03         | .04         | -.07        | -.05        |
| Achievement          | <b>.17</b>  | <b>.16</b>  | -.03        | .02         | .07         | .01        | <b>-.10</b> | <b>-.10</b> | <b>-.13</b> | <b>-.15</b> | .08         | .07         | .00         | .01         | -.08        | -.05        |
| Leisure              | <b>-.14</b> | <b>-.10</b> | <b>-.15</b> | <b>-.11</b> | -.06        | -.03       | -.02        | .03         | .01         | .02         | <b>-.14</b> | <b>-.15</b> | <b>-.13</b> | <b>-.12</b> | <b>-.18</b> | <b>-.16</b> |
| Home                 | <b>-.13</b> | -.06        | <b>-.15</b> | <b>-.10</b> | -.07        | -.05       | <b>-.13</b> | -.04        | <b>-.12</b> | <b>-.09</b> | <b>-.09</b> | <b>-.11</b> | <b>-.18</b> | <b>-.19</b> | <b>-.29</b> | <b>-.25</b> |
| Sports               | -.01        | .01         | -.07        | -.06        | .00         | .03        | <b>.14</b>  | <b>.15</b>  | <b>.13</b>  | <b>.13</b>  | <b>-.09</b> | -.08        | .03         | .08         | .04         | .02         |
| TV                   | <b>-.20</b> | <b>-.20</b> | <b>-.12</b> | <b>-.11</b> | <b>-.11</b> | -.05       | .03         | .03         | .08         | .07         | <b>-.14</b> | <b>-.14</b> | -.07        | -.07        | -.05        | <b>-.09</b> |

|           |             |             |             |             |            |      |            |            |             |            |             |             |             |             |             |             |
|-----------|-------------|-------------|-------------|-------------|------------|------|------------|------------|-------------|------------|-------------|-------------|-------------|-------------|-------------|-------------|
| Music     | .05         | .03         | .03         | .03         | .02        | .00  | .00        | -.03       | .05         | .05        | -.02        | -.01        | .02         | .03         | .04         | .05         |
| Money     | <b>.15</b>  | <b>.14</b>  | -.01        | .02         | .07        | .04  | .01        | -.02       | .00         | -.01       | .04         | .05         | .03         | .02         | .01         | .00         |
| Metaphors | .02         | -.01        | .06         | .06         | .00        | .01  | -.01       | -.01       | .06         | <b>.09</b> | .01         | .04         | -.04        | -.02        | -.02        | -.02        |
| Religion  | .03         | .00         | .02         | .04         | .01        | .01  | -.02       | -.02       | .07         | .08        | .01         | .03         | -.04        | -.02        | -.02        | -.01        |
| Death     | .02         | .04         | .03         | .02         | <b>.09</b> | .06  | .05        | .06        | -.04        | -.02       | <b>.09</b>  | <b>.09</b>  | .04         | .02         | -.03        | -.01        |
| Physical  | -.08        | <b>-.09</b> | <b>-.10</b> | <b>-.14</b> | .00        | .07  | <b>.13</b> | <b>.11</b> | .08         | .08        | -.05        | -.05        | .01         | .02         | <b>.13</b>  | <b>.13</b>  |
| Body      | .00         | .00         | <b>-.10</b> | <b>-.09</b> | .05        | .02  | -.01       | -.02       | -.03        | -.03       | .07         | .06         | .00         | .00         | -.03        | -.03        |
| Sexual    | .04         | .02         | .00         | -.01        | .02        | .00  | <b>.14</b> | <b>.15</b> | -.03        | .00        | <b>.09</b>  | .08         | <b>.14</b>  | <b>.13</b>  | .03         | .04         |
| Eating    | <b>-.10</b> | <b>-.10</b> | -.05        | <b>-.10</b> | -.02       | .08  | <b>.10</b> | <b>.09</b> | <b>.12</b>  | <b>.10</b> | <b>-.09</b> | <b>-.09</b> | -.01        | .00         | <b>.16</b>  | <b>.16</b>  |
| Sleep     | <b>-.20</b> | <b>-.19</b> | <b>-.13</b> | <b>-.11</b> | -.05       | -.04 | .00        | .02        | <b>-.09</b> | -.05       | .00         | -.03        | -.04        | -.04        | <b>-.13</b> | <b>-.13</b> |
| Grooming  | <b>.09</b>  | .08         | <b>-.15</b> | <b>-.13</b> | -.07       | -.06 | -.03       | -.03       | -.08        | -.08       | -.05        | -.04        | <b>-.10</b> | <b>-.09</b> | <b>-.10</b> | <b>-.09</b> |

Note.  $N = 506-507$ .

Statistically significant correlations ( $r_s \geq .09$ ,  $p_s < .05$ ) are marked bold and shaded gray.
